# Supplementary material
Source: PubMed Central journal article supplement (PMC5562438)
Supplement: NIHMS845534-supplement-supplement_1.pdf [file NIHMS845534-supplement-supplement_1.pdf]

## **Supplement**

**See Supplement Figure and Supplement Figure Legend.**

**Supplement Figure Legend:** For the NYU-CIBIC-Plus primary outcome assessment, data for one subject, who had been randomized to the Usual Community Care + Financial Compensation (UCC+FC) (comparator) group was excluded because of a data quality concern. Herein, we present the outcomes with the inclusion of the previously excluded UCC+FC subject. The Supplement Figure shows the results for the 20 subjects. For the NYU-CIBIC-Plus, baseline is set at 4. Consequently, per the design of CIBIC-Plus scales, there are no between group differences at baseline. Scores of 1, 2, and 3 correspond to “markedly,” “moderately,” and “minimally” improved, respectively, a score of 4 indicates “unchanged,” and scores of 5, 6, and 7 correspond to “minimally,” “moderately,” and “markedly,” worse, respectively. Beginning with the first post-baseline evaluation at week 4, the Comprehensive, Individualized, Person-Centered Management (CI-PCM) program (intervention), subject group (N=10), showed improvement, whereas the UCC+FC comparator subject group (N=10), showed decline. Between group differences were robustly significant at week 4 (intervention  $2.6 \pm 0.4$ [SE], comparator  $4.4 \pm 0.4$ [SE],  $p < 0.01$ ), week 12 (intervention  $2.2 \pm 0.3$ [SE], comparator  $5.0 \pm 0.5$ [SE],  $p < 0.01$ ) and week 28 (intervention  $2.3 \pm 0.4$ [SE], comparator  $5.3 \pm 0.5$ [SE],  $p < 0.01$ ) observation periods.

Supplement Figure: The New York University Clinician's Interview Based Impression of Change-Plus Caregiver Input (NYU-CIBIC-Plus) primary outcome results with the entire, N=20, study population including the subject who had been excluded from the main text analysis because of data quality concerns.

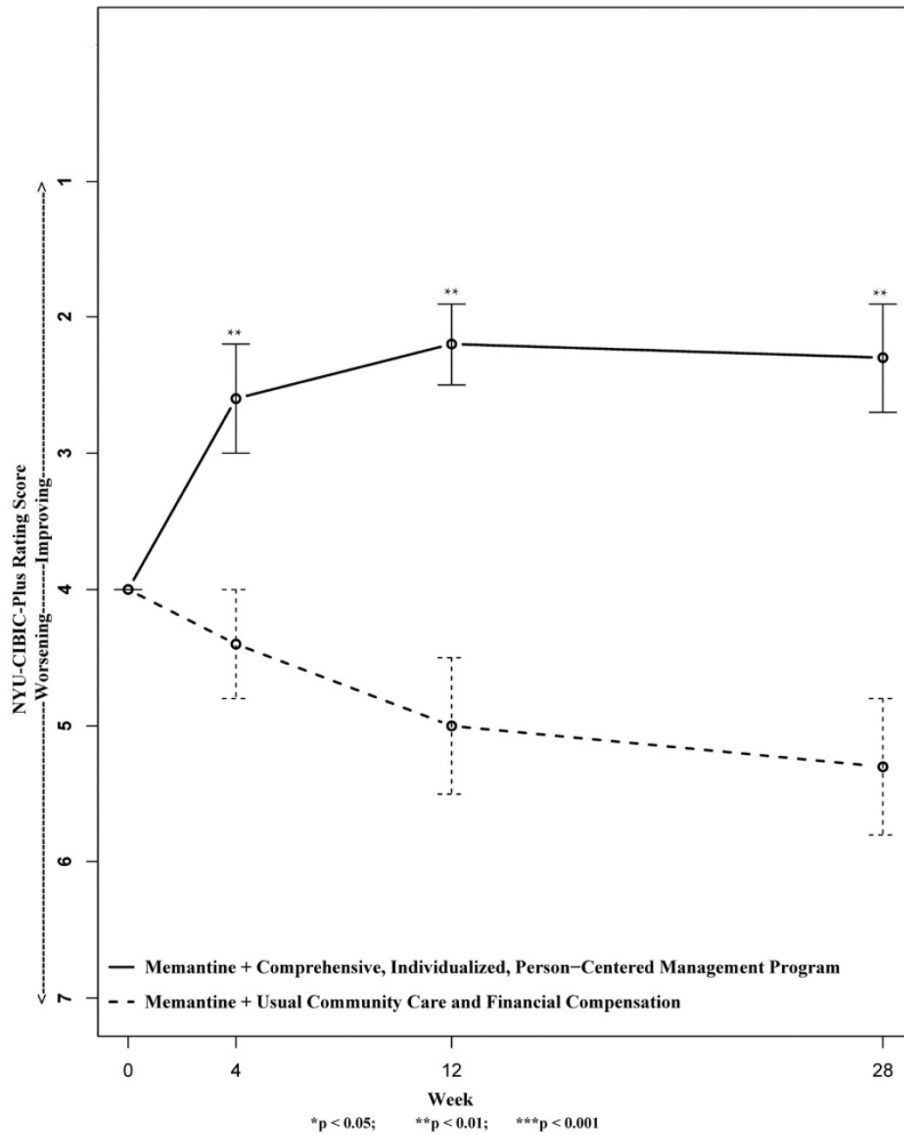

Per design, the baseline NYU-CIBIC-Plus score is set at a value of “4” signifying “no change.” A lower score indicates improvement.

**Bars indicate mean (+/-SE) scores at each specified observation period.**
